# Supplementary material for: Efficient gene knockout and genetic interaction screening using the in4mer CRISPR/Cas12a multiplex knockout platform
Source: PubMed Central journal article supplement (PMC11055879; doi:10.1038/s41467-024-47795-3), 2024-04-27
Supplement: 41467_2024_47795_MOESM1_ESM.pdf [file 41467_2024_47795_MOESM1_ESM.pdf]

**Efficient gene knockout and genetic interaction screening using the in4mer CRISPR/Cas12a  
multiplex knockout platform**

*Anvar et al.*

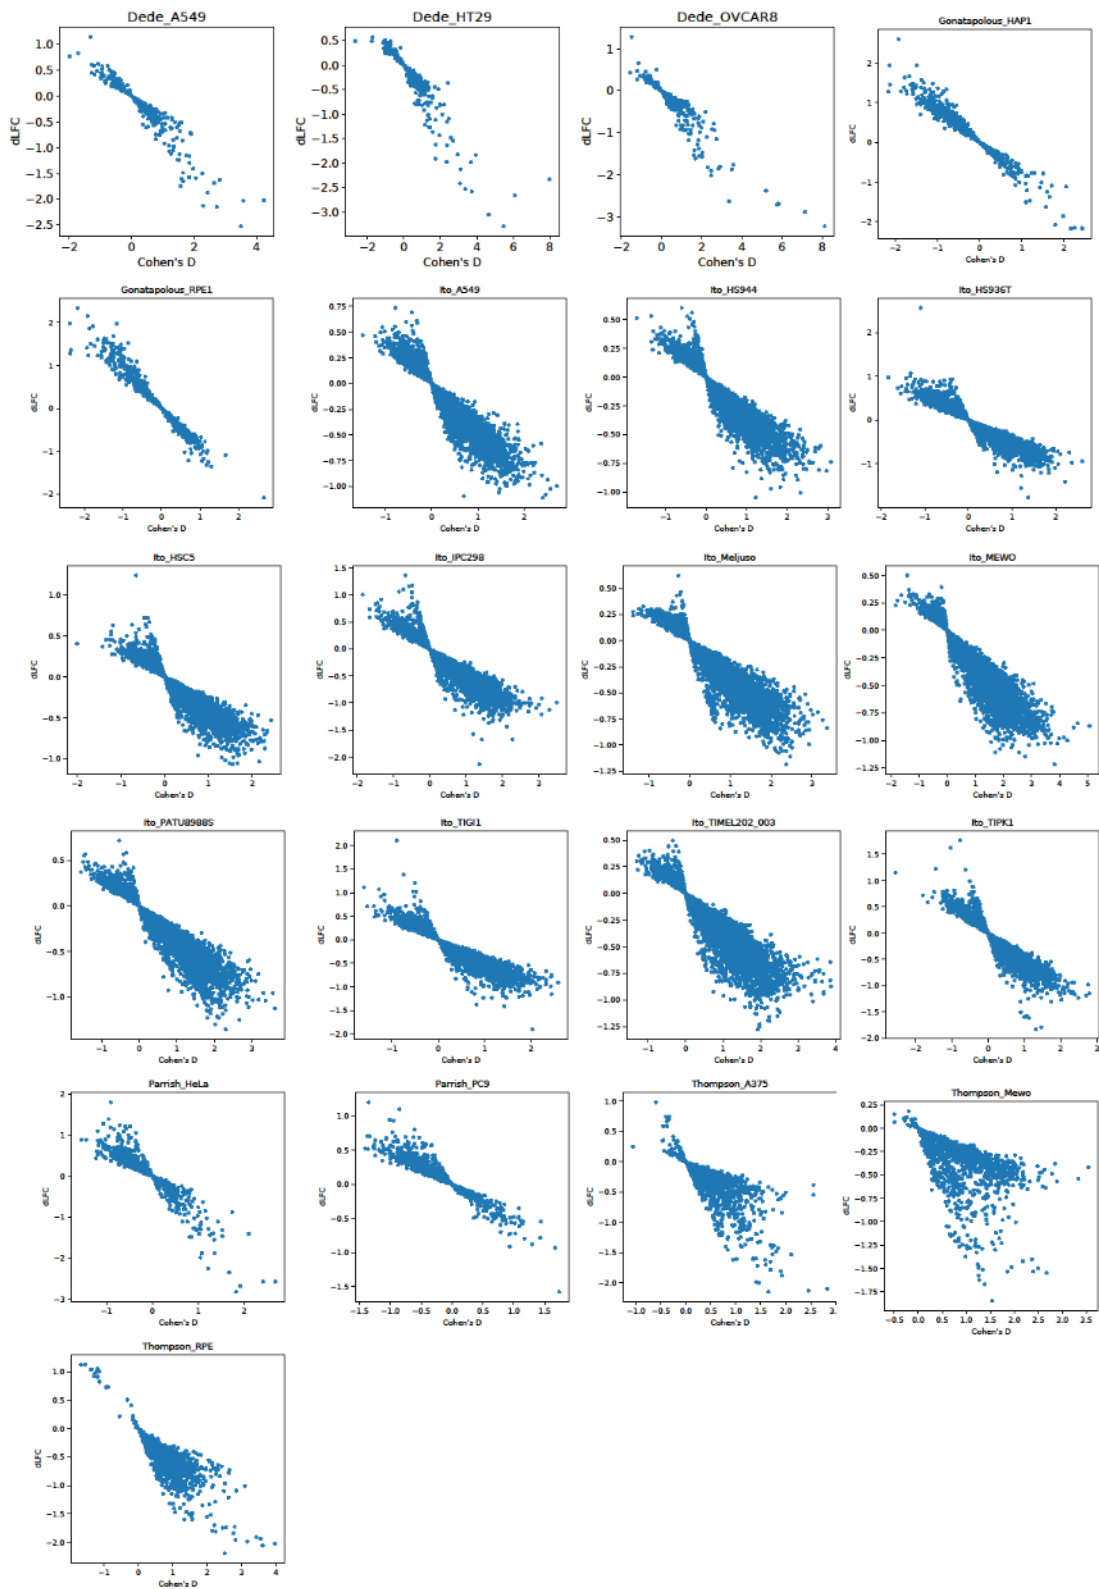

**Supplementary Figure 1. Cohen's d vs. dLFC for all cell lines in all five paralog screens.**

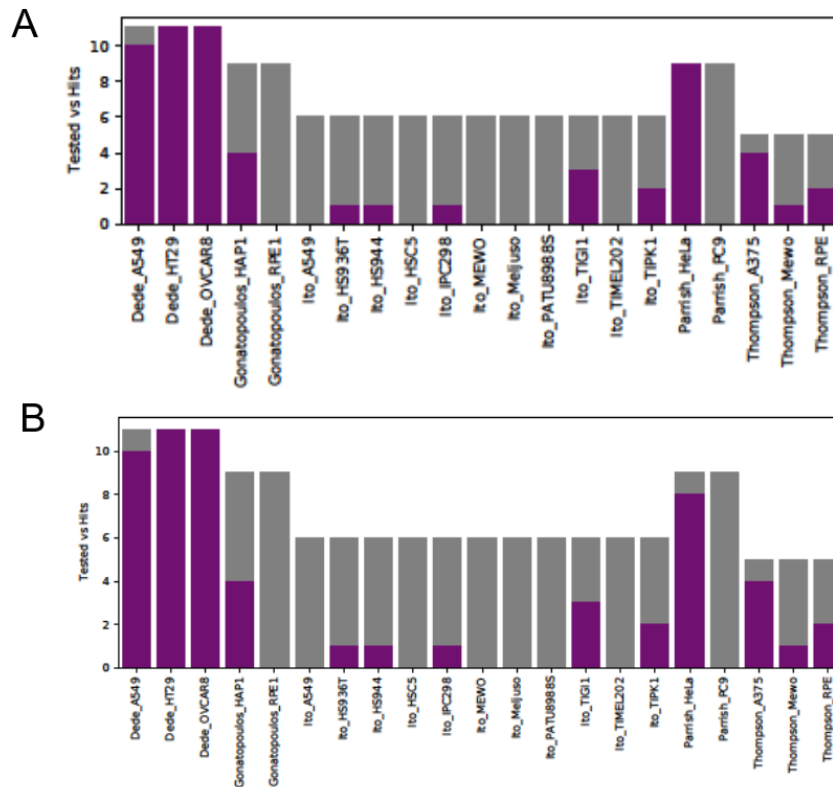

**Supplementary Figure 2. Performance of paralog screens vs. candidate gold standards.** (A) Across 21 cell line screens from 5 different platforms, number of candidate gold standards screened (gray) vs. hits (purple), measured by  $dLFC < -1$ . (B) Hits by Cohen's  $d > 0.8$ .

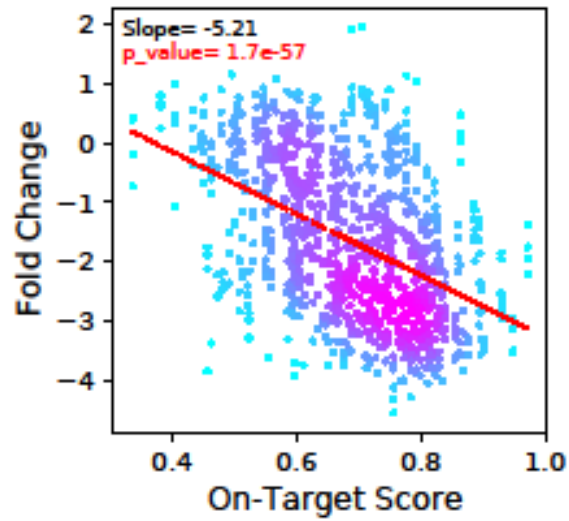

**Supplementary Figure 3. Fold change vs. CRISPick on-target score for essential genes.** Using CRISPick, more than 1000 positive control guides were selected targeting known essential genes. CRISPick on-target score (x-axis) is a good predictor of guide activity, as measured by fold change in a pooled library knockout screen (y-axis).

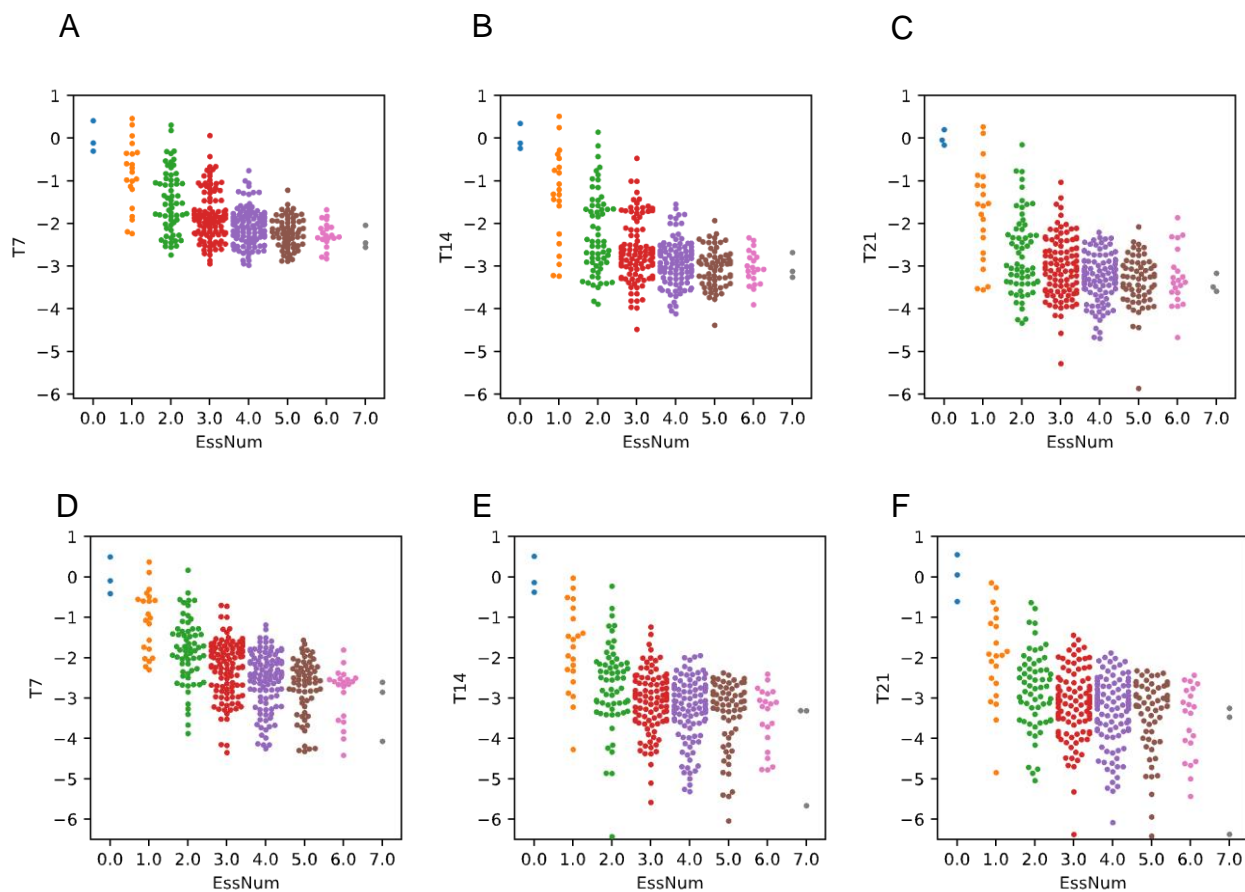

**Supplementary Figure 4. Fold change of guide arrays vs. number of essential guides on the array in the 7mer library at different time points (n=384 arrays). Forward library, (A) Day 7, (B) Day 14, (C) Day 21 after puromycin selection. Reverse library, (D) Day 7, (E) Day 14, (F) Day 21 after puromycin selection.**

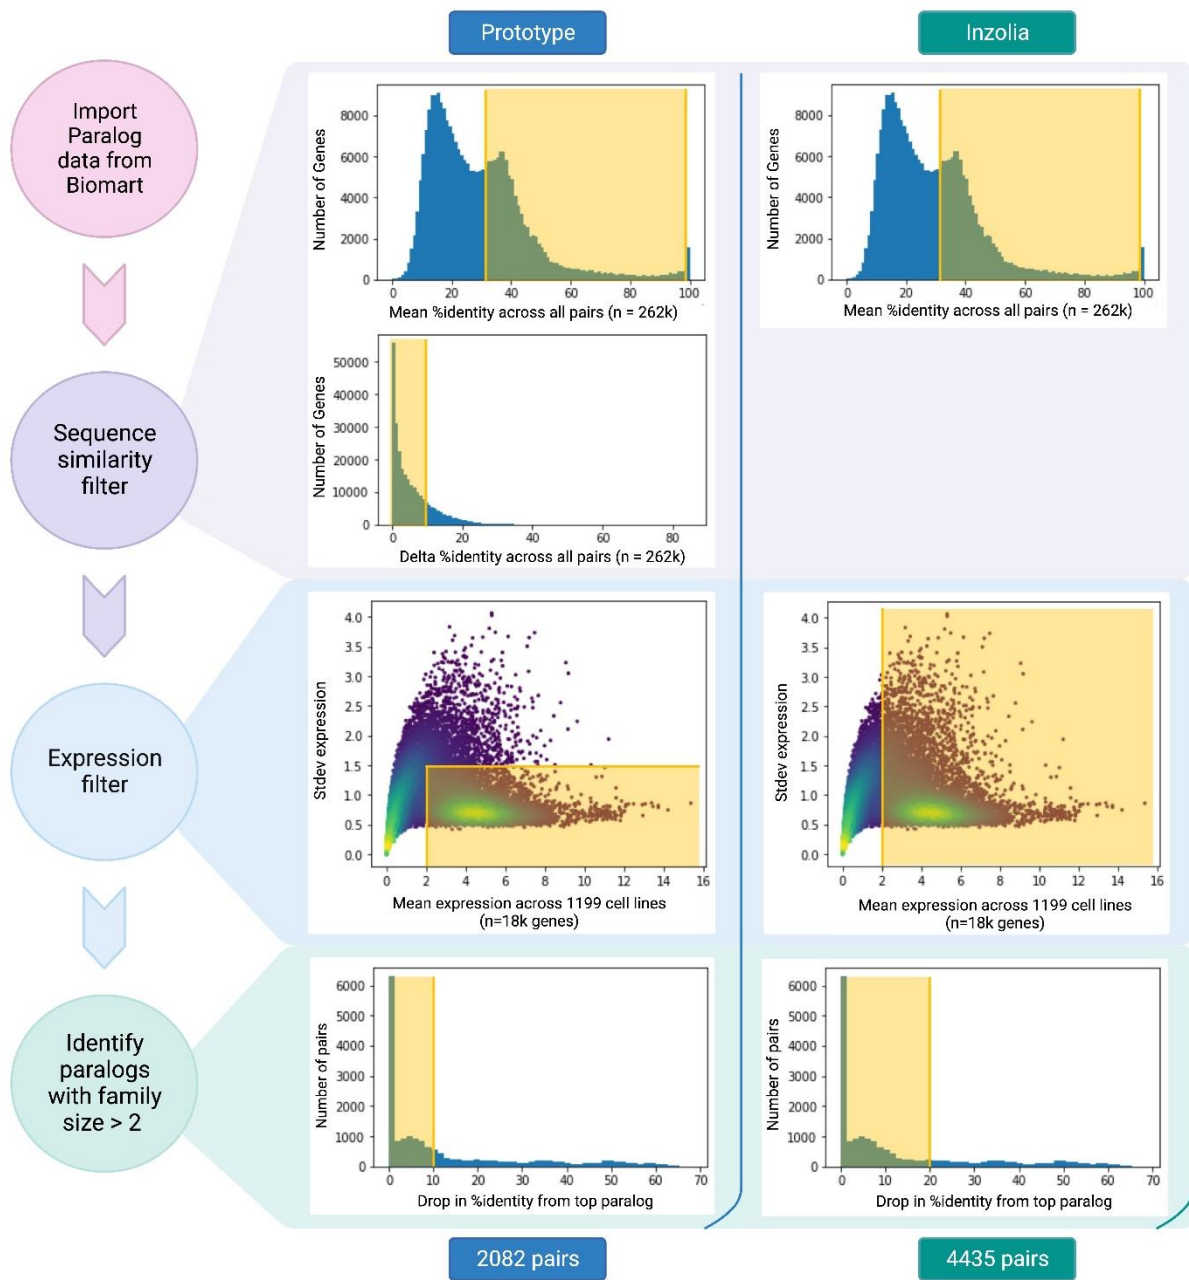

Supplementary Figure 5. Paralog selection pipeline, prototype, and Inzolia libraries.

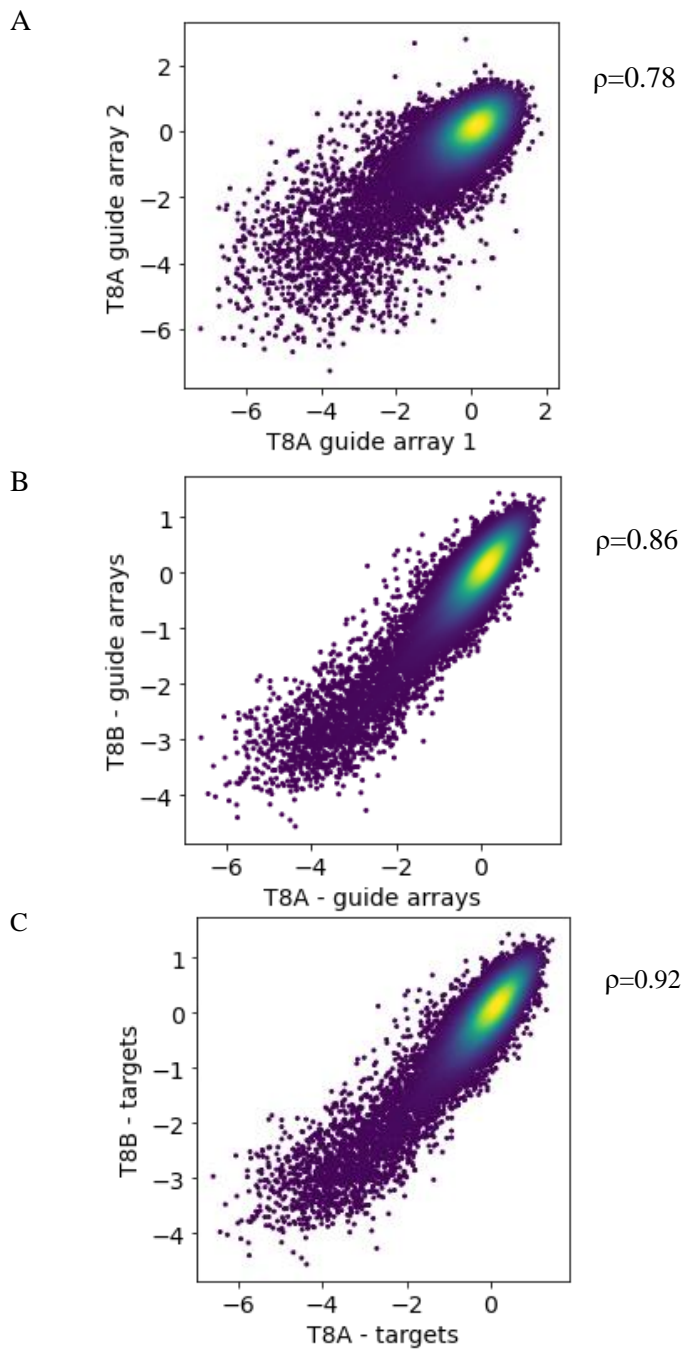

**Supplementary Figure 6. Correlation within and between replicates at the array and gene levels.** (A) log fold change (K-562 screen, T8) for guide arrays containing the same gRNA sequences in different order (n=21,783 common target sets). Pearson's  $\rho=0.78$ . (B) technical/biological replicates (A,B) from one library transduction split into two replicates after puromycin selection. N=43,568 4plex guide arrays. Pearson's  $\rho=0.86$ . (C) mean of guide array fold changes targeting the same gene/gene set (n=21,784 targets), A vs B replicates. Pearson's  $\rho=0.92$ .

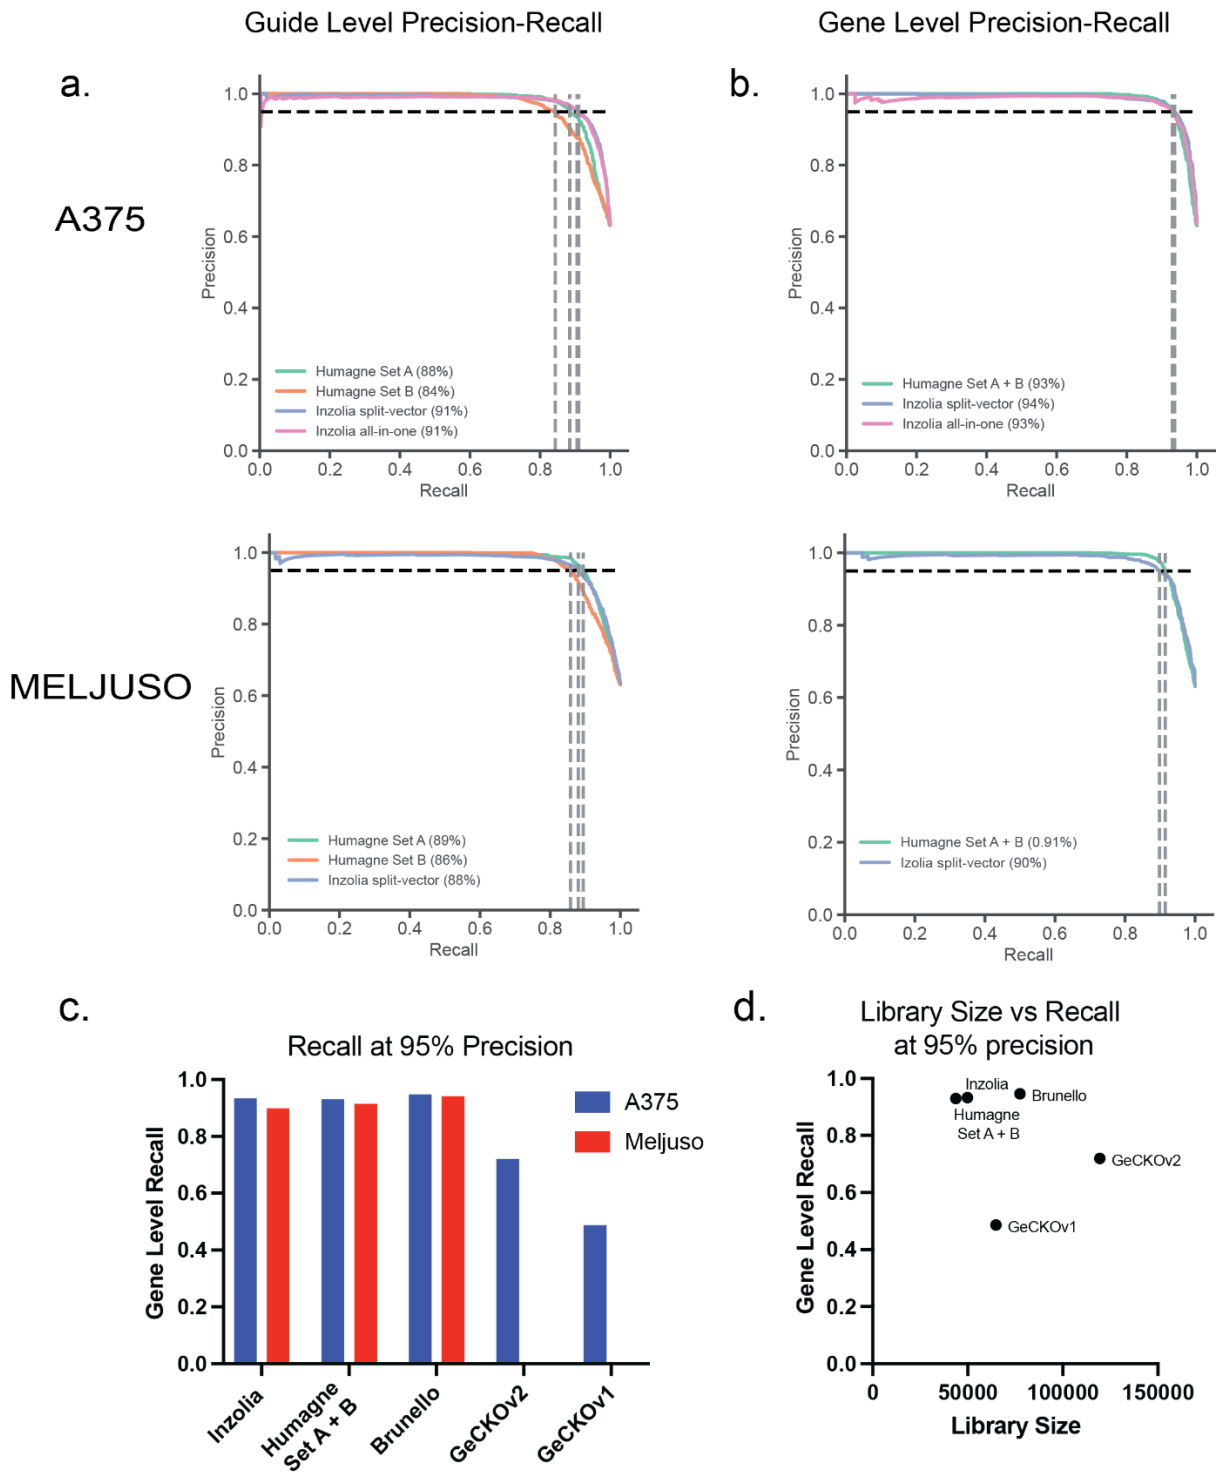

**Supplementary Figure 7. Comparison of Inzolia and Humagne Sets A & B.** (A) Guide level precision-recall curves for Humagne Set A, Humagne Set B, and Inzolia in A375 and MELJUSO cells. The recall at 95% precision is indicated for each curve in parentheses. (B) Gene level precision-recall curves for Humagne Set A + B, and Inzolia in A375 and MELJUSO cells. The recall at 95% precision is indicated for each curve in parentheses. (C) Gene level recall at 95% precision for selected genome-wide libraries in A375 and Meljuso. (D) Gene level recall at 95% precision compared to library size for selected genome-wide libraries.



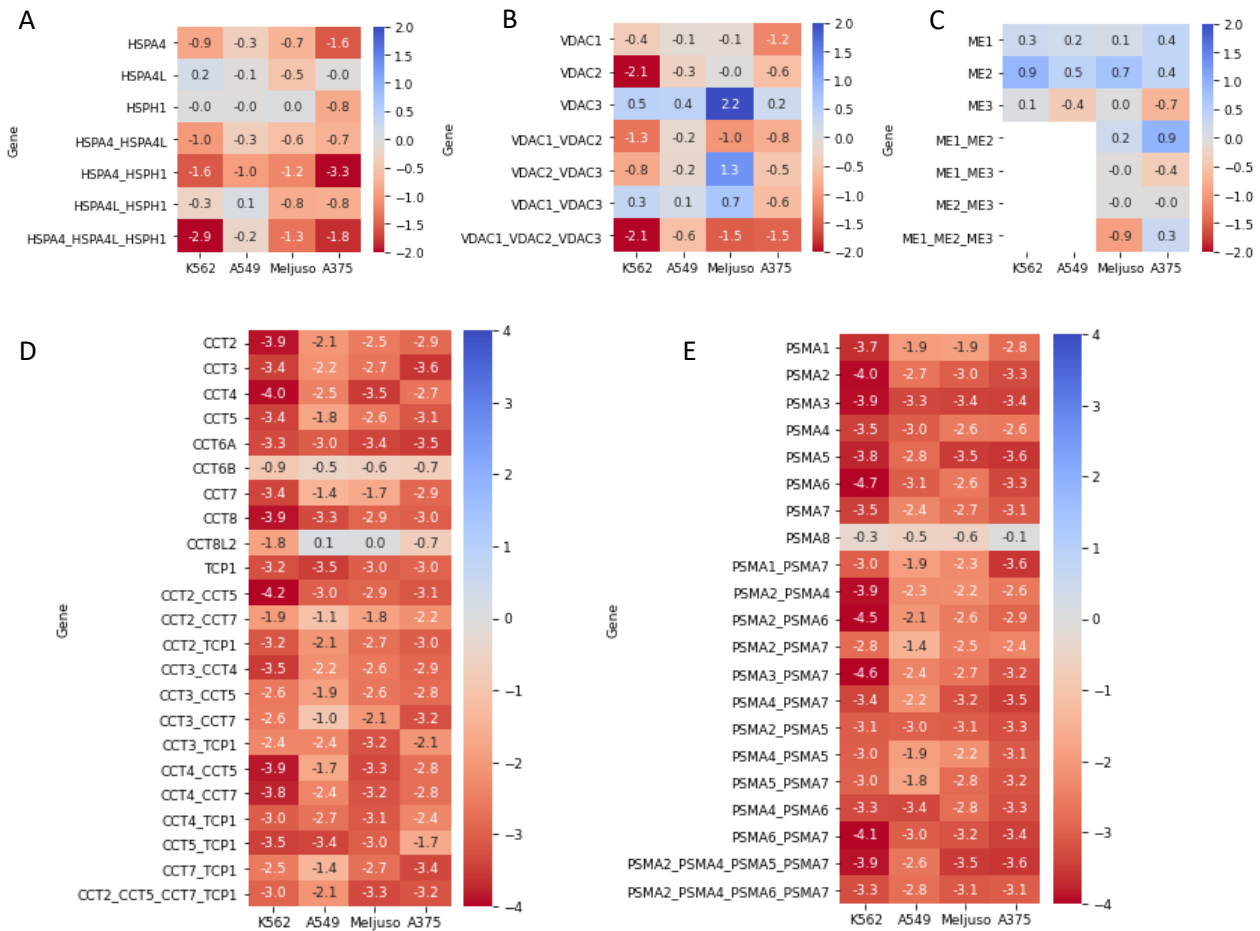

**Supplementary Figure 8. Higher-order genetic interactions.** (A) Candidate three-way synthetic lethal interactions among HSPA4 family members. (B) Candidate three-way interactions among VDAC1/2/3 family. (C) Candidate three-way interactions among ME1/2/3. (D-E) Masking/suppressor interactions among CCT complex and proteasome subunits. Single knockout induces severe loss of fitness and subsequent knockout of other subunits does not add to severity of phenotype.
